# Supplementary material for: Fate and Effect of Intravenously Infused Mesenchymal Stem Cells in a Mouse Model of Hepatic Ischemia Reperfusion Injury and Resection
Source: Hindawi journal article supplement (doi:10.1155/2016/5761487), 2016-01-01
Supplement: f1 [file 5761487.f1.pdf]

Figure S1

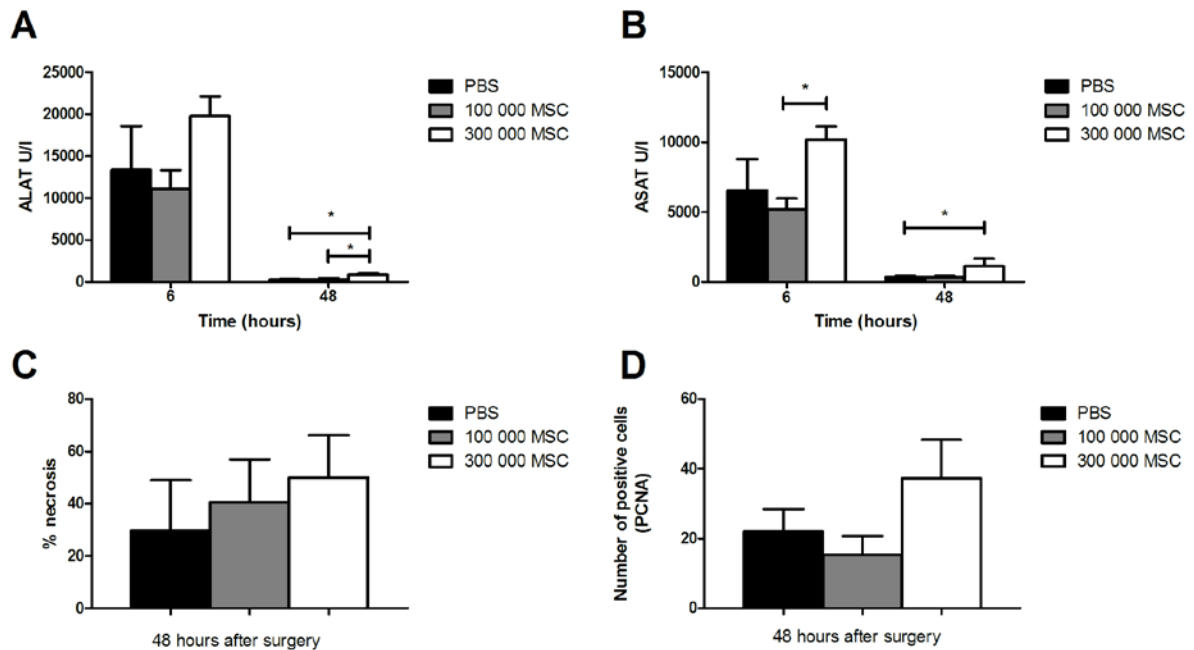

**Figure S1: Hepatocellular injury after infusion of PBS,  $1 \times 10^5$  or  $3 \times 10^5$  MSC directly after IRI and PH.** (A) Six hours after IRI and PH serum ALAT levels showed no significant differences between PBS,  $1 \times 10^5$  or  $3 \times 10^5$  MSC infused mice. Forty-eight hours after IRI and PH, mice infused with  $3 \times 10^5$  MSC showed significant higher serum levels of ALAT compared to the PBS and  $1 \times 10^5$  MSC treated mice. (B) Mice infused with  $3 \times 10^5$  MSC showed significant higher serum ASAT levels six hours after IRI and PH compared with mice infused with  $1 \times 10^5$  MSC. Forty-eight hours after IRI and PH mice treated with  $3 \times 10^5$  MSC showed significant higher levels of ASAT compared to PBS treated mice. (C) Forty-eight hours after IRI and PH there was no difference in percentage of necrosis in liver tissue between mice infused with PBS,  $1 \times 10^5$  or  $3 \times 10^5$  MSC. However, mice infused with  $3 \times 10^5$  MSC show a trend towards higher percentage of necrosis compared to PBS treated mice. (D) The number of PCNA positive cells was not significantly different. However, mice treated with  $3 \times 10^5$  MSC might show a trend towards higher number of proliferating cells compared to PBS treated mice. These data suggest that there is more liver damage in mice treated with  $3 \times 10^5$  MSC, and hence a stronger regenerative response. The data are expressed as means  $\pm$  SEM, ( $*P < 0.05$ ) vs PBS or  $1 \times 10^5$  MSC infused mice).
